# Supplementary material for: Synthesis and surface characterization of well-defined amphiphilic block copolymers composed of polydimethylsiloxane and poly[oligo(ethylene glycol) methacrylate]
Source: Royal Society of Chemistry journal article supplement (doi:10.1039/c7ra02569f), 2017-01-01
Supplement: c7ra02569f1.pdf [file c7ra02569f1.pdf]

**Synthesis and surface characterization of well-defined  
amphiphilic block copolymers composed of  
polydimethylsiloxane and poly[oligo(ethylene glycol)  
methacrylate]**

Raita Goseki<sup>a</sup>, Ling Hong<sup>a</sup>, Manabu Inutsuka<sup>b</sup>, Hideaki Yokoyama<sup>\*b</sup>, Kohzo Ito<sup>b</sup>, and Takashi Ishizone<sup>\*a</sup>

<sup>†</sup>Department of Chemical Science and Engineering, Tokyo Institute of Technology, 2-12-1-S1-13 O-okayama, Meguro-ku, Tokyo, 152-8552 (Japan)

<sup>‡</sup>Department of Advanced Materials Science, School of Frontier Sciences, The University of Tokyo, 5-1-5 Kashiwano-ha, Kashiwa, Chiba, 277-8561 (Japan)

Corresponding author: T. Ishizone, E-mail: [tishizon@polymer.titech.ac.jp](mailto:tishizon@polymer.titech.ac.jp), H. Yokoyama, E-mail: [yokoyama@molle.k.u-tokyo.ac.jp](mailto:yokoyama@molle.k.u-tokyo.ac.jp)

## Supporting Information

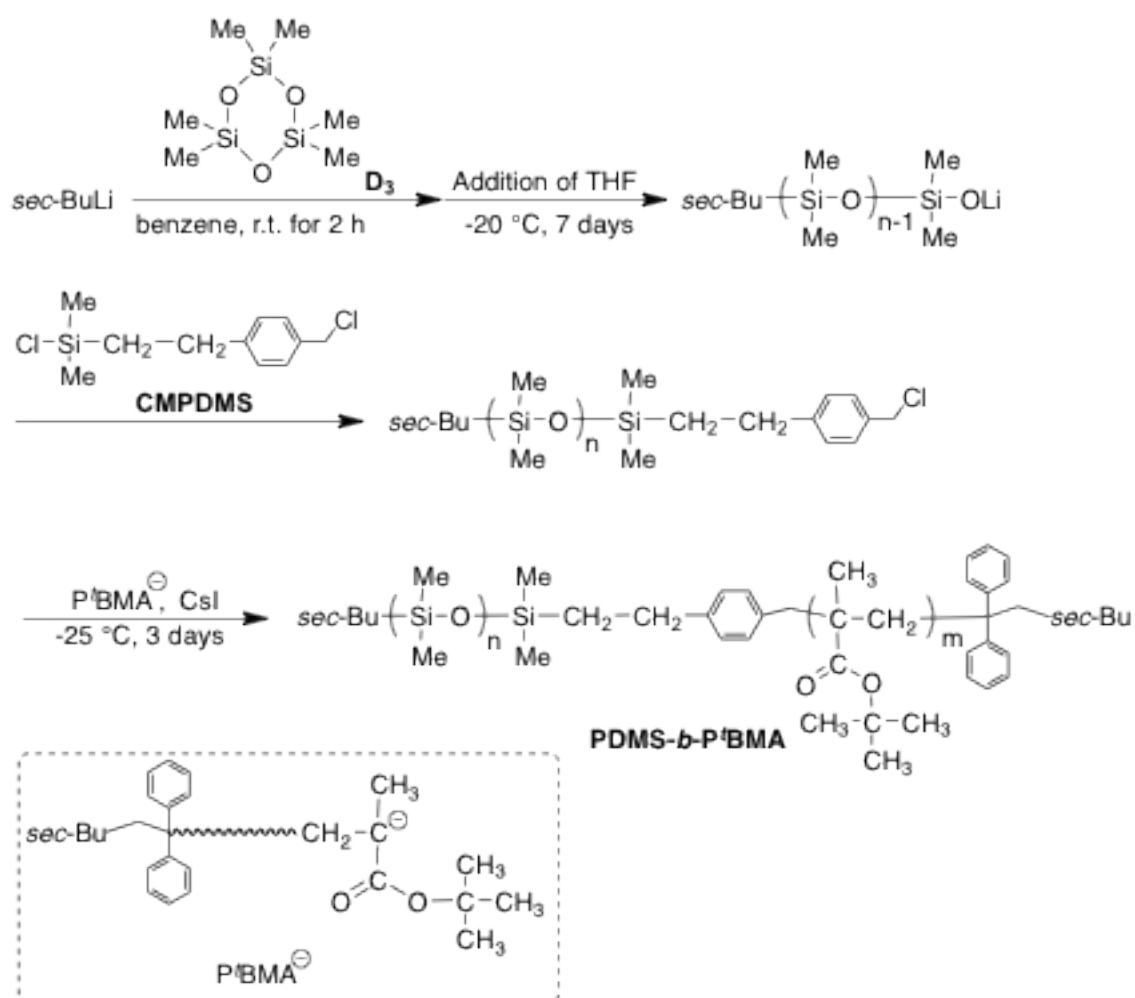

**Scheme S1.** Synthetic scheme of PDMA-*b*-P'BMS by coupling reaction.

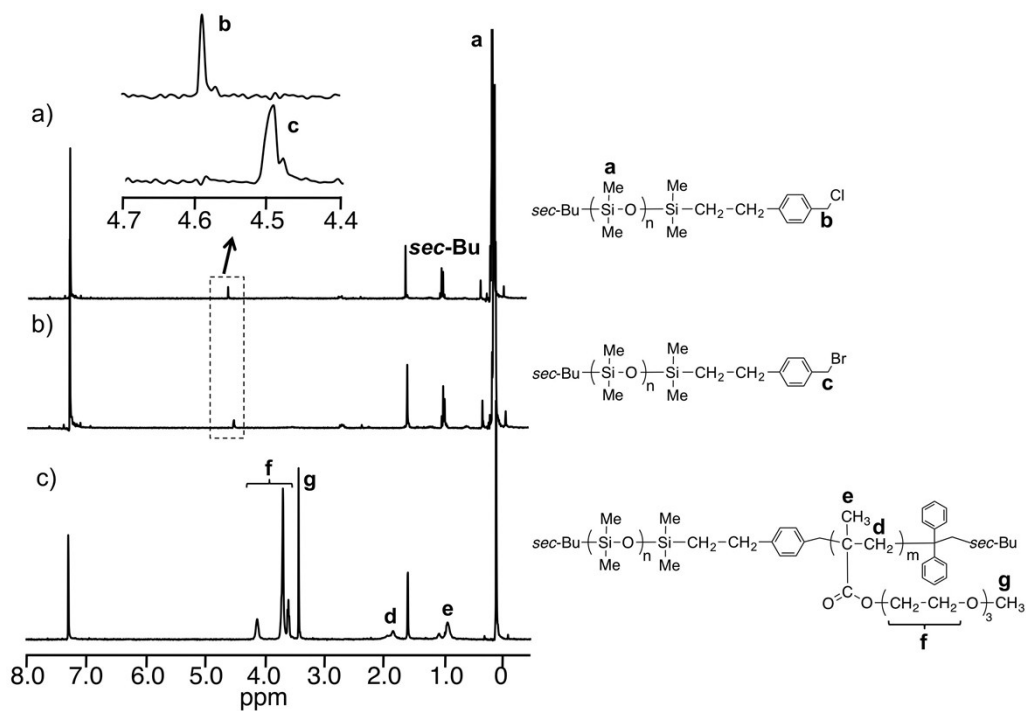

**Figure S1.**  $^1\text{H}$  NMR spectra of a) PDMS-BnCl, b) PDMS-BnBr, and c) PDMS-*b*-PM3.

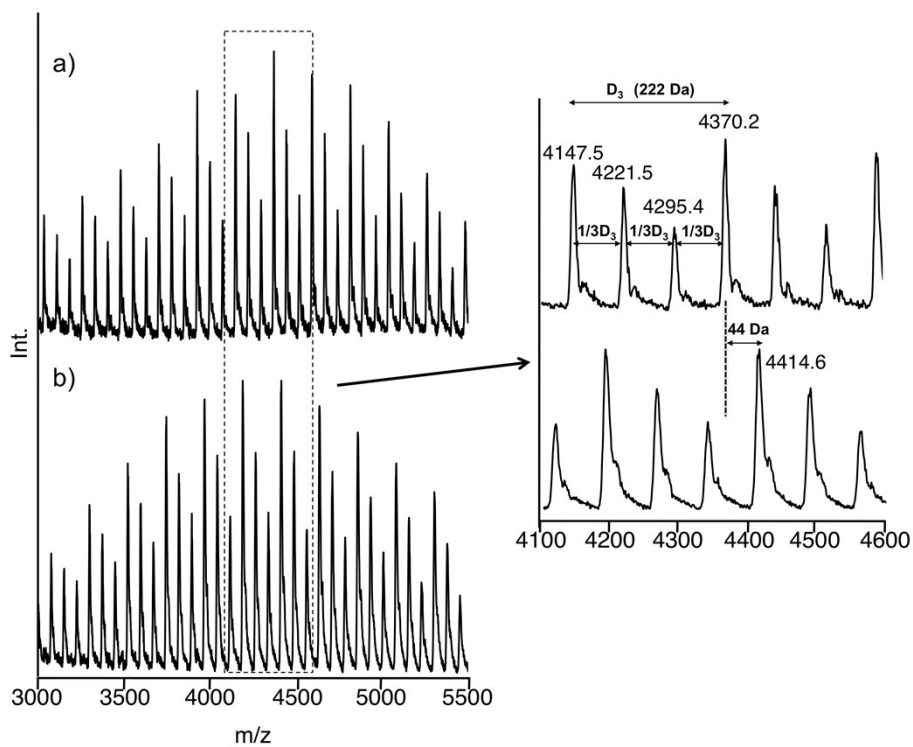

**Figure S2.** MALDI-TOF-MASS spectra of a) PDMS-BnCl and b) PDMS-BnBr.

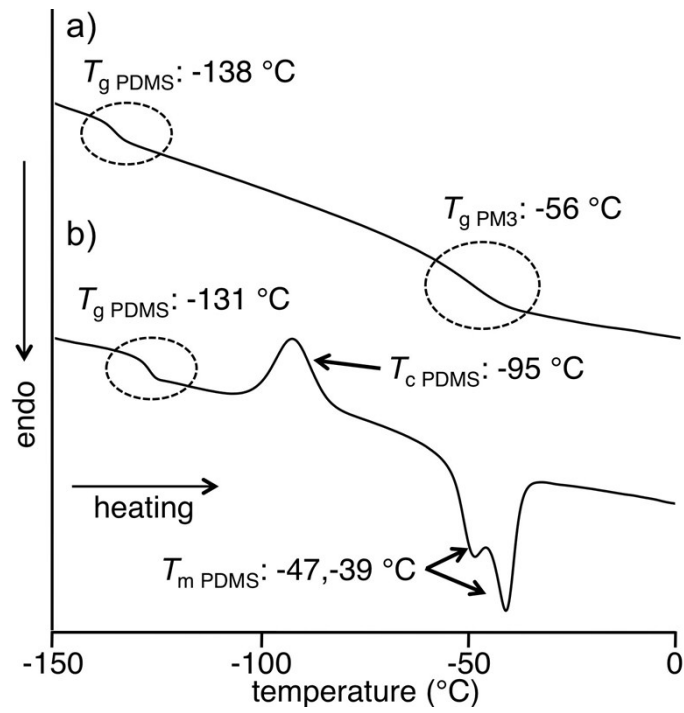

**Figure S3.** DSC charts of a) PDMS-*b*-PM3 (61 wt%) and b) PDMS-*b*-PM3 (48 wt%).

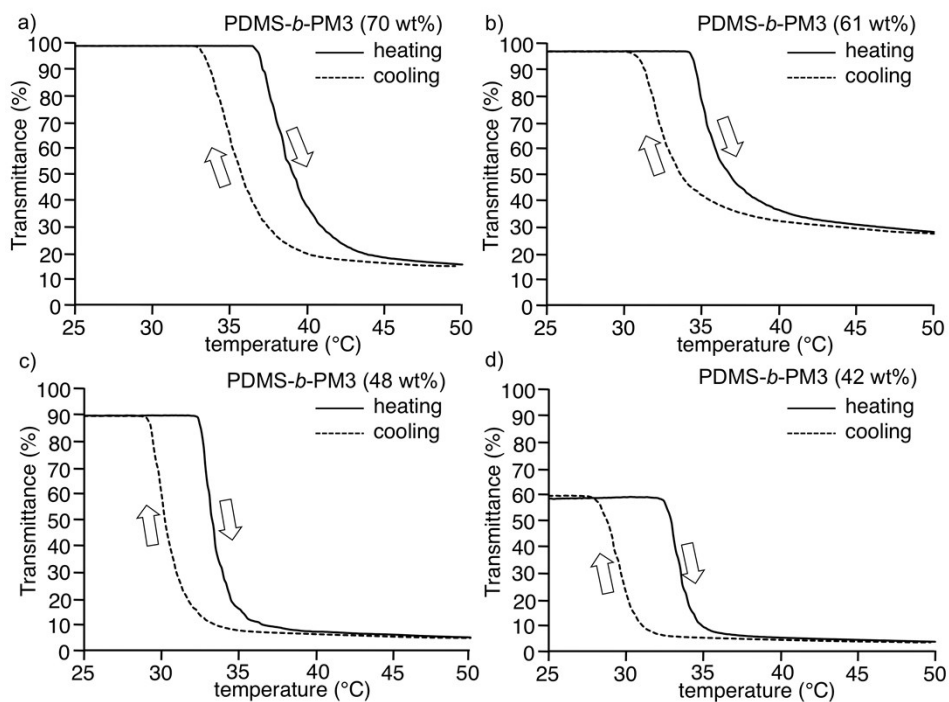

**Figure S4.** Temperature dependence of optical transmittance at 500 nm for PDMS-*b*-PM3 block copolymers during a heating and cooling cycle at 0.5 °C/min in a 0.2 mg/mL aqueous solution.

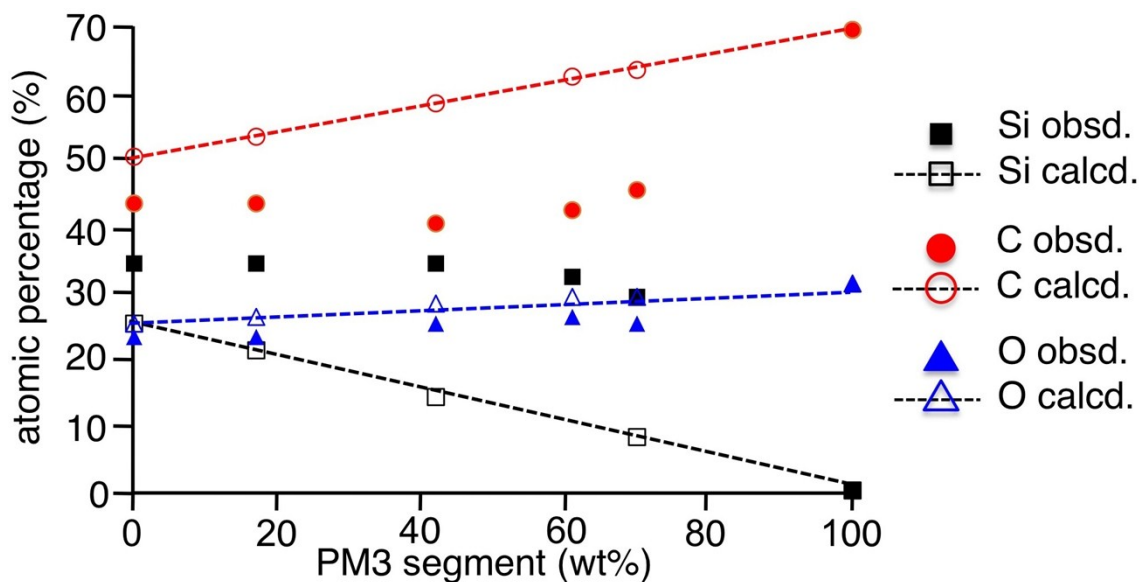

**Figure S5.** Atomic percentage of PDMS-*b*-PM3s (TOA = 50°).

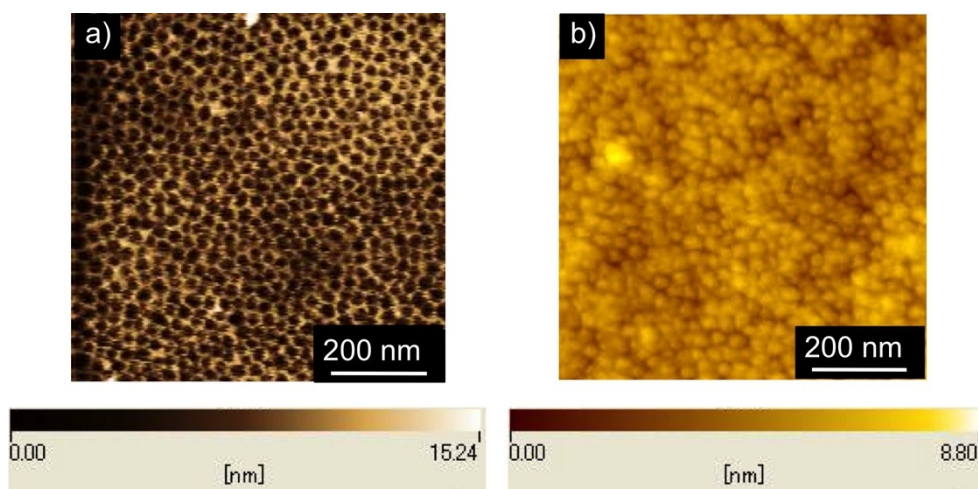

**Figure S6.** AFM height images of PDMS-*b*-PM3(70 wt%) before (a) and after O<sub>2</sub>-RIE (b).

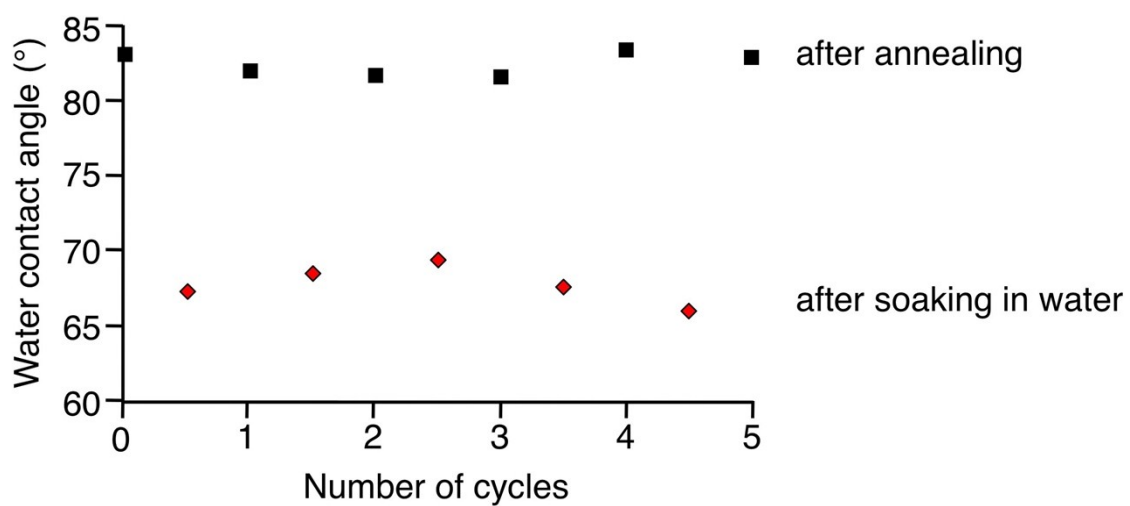

**Figure S7.** Repeated measurement of water contact angle of PDMS-*b*-PM3 (17 wt%).

**Table S1.** Solubility of PDMS-*b*-PM3 Block Copolymers

| Solvent           | PDMS- <i>b</i> -PM3 (PM3 wt%) |                |                |                |    |    | PDMS | PM3             | PS- <i>b</i> -PM3 |
|-------------------|-------------------------------|----------------|----------------|----------------|----|----|------|-----------------|-------------------|
|                   | 70                            | 61             | 48             | 42             | 30 | 17 |      |                 |                   |
| Hexane            | I                             | I              | S              | S              | S  | S  | S    | I               | I                 |
| Benzene           | S                             | S              | S              | S              | S  | S  | S    | S               | S                 |
| Toluene           | S                             | S              | S              | S              | S  | S  | S    | S               | S                 |
| CHCl <sub>3</sub> | S                             | S              | S              | S              | S  | S  | S    | S               | S                 |
| Acetone           | S                             | S              | S              | S              | I  | I  | I    | S               | S                 |
| THF               | S                             | S              | S              | S              | S  | S  | S    | S               | S                 |
| MeOH              | S                             | S              | S              | S              | P  | P  | I    | S               | I                 |
| Water             | S <sup>a</sup>                | S <sup>a</sup> | S <sup>a</sup> | S <sup>a</sup> | I  | I  | I    | S (below 52 °C) | I                 |

S: soluble, P: partially soluble, I: insoluble. <sup>a</sup>micelle formation.
